# Supplementary material
Source: publisher figshare collection journal article supplement (https://tandf.figshare.com/ndownloader/files/20714553)
Supplement: Supplementary file 1 [file 20714553]

| **Online Appendix**  **Table 1. Summary Statistics** | | | | | | | | |
| --- | --- | --- | --- | --- | --- | --- | --- | --- |
|  | Minimum | | Maximum | | Median | | Standard Deviation | |
| *Outcome Variables* | |  | |  | |  | |  | |
| Number of Articles | | 0 | | 48 | | 11 | | 10.61 | |
| ID Law | | 0 | | 100 | | 1 | | 16.78 | |
| Voter Registration | | 0 | | 60 | | 3 | | 11.36 | |
| Voter ID | | 0 | | 109 | | 7 | | 21.30 | |
|  | |  | |  | |  | |  | |
| *Predictor Variables* | |  | |  | |  | |  | |
| Battleground | | 0 | | 1 | | - | | - | |
| Restrictive Voting Law | | 0 | | 1 | | - | | - | |
| Number of Fraud Cases | | 0 | | 9 | | 0 | | 1.76 | |
| % ALEC | | 1.41 | | 37.78 | | 16.37 | | 9.41 | |
| Pres Vote Difference | | -17.46 | | 21.85 | | 1.15 | | 9.50 | |
| % Black | | .680 | | 30.43 | | 8.81 | | 9.12 | |
| % Hispanic | | .766 | | 38.45 | | 6.71 | | 8.14 | |
| Newspaper Circulation | | 12 | | 657.47 | | 142.90 | | 132.13 | |
| Note: For outcome variables, cells are counts of articles and phrases. All outcome variables are at the newspaper level. For predictor variables, presidential vote difference is Obama vote – McCain vote. Presidential vote difference, percent black, and percent Hispanic are at the media market level. Battleground, restrictive voting law, number of fraud cases, and percent ALEC are at the state level. Newspaper circulation is in the thousands. | | | | | | | | |

**Table 2. State Newspapers**

| **State** | **Newspaper** | **State** | **Newspaper** | | |  |
| --- | --- | --- | --- | --- | --- | --- |
| Alabama | *Birmingham News* | Montana | | | *Billings Gazette* | | | | | |  |
| Alaska | *Anchorage Daily News* | Nebraska | | | *Omaha World-Record* | | | |  | | |
| Arizona | *Arizona Republic* | Nevada | | | *Las-Vegas Review-Journal* | | | |  | | |
| Arkansas | *Arkansas Democrat Gazette* | New Hampshire | | | *Union-Leader* | | | |  | | |
| California | *Los Angeles Times* | New Jersey | | | *Star Ledger* | | | | | | | |  |
| Colorado | *Denver Post* | New Mexico | | | *Albuquerque Journal* | | | |  | | |
| Connecticut | *Hartford Courant* | New York | | | *Daily News* | | | |  | | |
| Delaware | *Delaware State News* | North Carolina | | | *Charlotte Observer* | | | |  | | |
| Florida | *Tampa Bay Times* | North Dakota | | | *Bismarck Tribune* | | | |  | | |
| Georgia | *Atlanta Journal & Const* | Ohio | | | *Plain Dealer* | | | |  | | |
| Hawaii | *Honolulu Star-Bulletin* | Oklahoma | | | *Daily Oklahoman* | | | |  | | |
| Idaho | *Idaho Statesmen* | Oregon | | | *Oregonian* | | | |  | | |
| Illinois | *Chicago Sun-Times* | Pennsylvania | | | *Philadelphia Inquirer* | | | |  | | |
| Indiana | *Indianapolis Star* | Rhode Island | | | *Providence Journal* | | | |  | | |
| Iowa | *Quad-City Times* | South Carolina | | | *Post and Courier* | | | |  | | |
| Kansas | *Wichita Eagle* | South Dakota | | | *Aberdeen American News* | | | |  | | |
| Kentucky | *Lexington Herald-Leader* | Tennessee | | | *Knoxville News Sentinel* | | | |  | | |
| Louisiana | *Times-Picayune* | Texas | | | *Dallas Morning News* | | | |  | | |
| Maine | *Bangor Daily News* | Utah | | | *Salt Lake Tribune* | | | |  | | |
| Maryland | *Baltimore Sun* | Vermont | | | *Rutland Herald* | | | |  | | |
| Massachusetts | *Boston Herald* | Virginia | | | *Richmond Times-Dispatch* | | | |  | | |
| Michigan | *Detroit Free Press* | Washington | | | *Seattle Post-Intelligencer* | | | |  | | |
| Minnesota | *Star Tribune* | West Virginia | | | *Charleston Gazette* | | | |  | | |
| Mississippi | *Sun Herald* | Wisconsin | | | *Milwaukee Journal Sentinel* | | | |  | | |
| Missouri | *St. Louis Post-Dispatch* | Wyoming | | | *Wyoming Tribune-Eagle* | | | |  | | |
|  |  |  | |  | | | |  | |
|  |  |  |  | | |  |
|  |  |  |  | | |  |

**Table 3. Battleground and New Restrictive Law States in 2012**

| **Battleground States** | | **New Restrictive Law States** | | | |  |
| --- | --- | --- | --- | --- | --- | --- |
| Colorado |  | Alabama | | |  | | | | | |  |
| Florida |  | Florida | | |  | | | |  | | |
| Iowa |  | Georgia | | |  | | | |  | | |
| Nevada |  | Illinois | | |  | | | |  | | |
| North Carolina |  | Iowa | | |  | | | | | | | |  |
| Ohio |  | Kansas | | |  | | | |  | | |
| Virginia |  | Maine | | |  | | | |  | | |
| Wisconsin |  | Mississippi | | |  | | | |  | | |
|  |  | New Hampshire | | |  | | | |  | | |
|  |  | Ohio | | |  | | | |  | | |
|  |  | Pennsylvania | | |  | | | |  | | |
|  |  | Rhode Island | | |  | | | |  | | |
|  |  | South Carolina | | |  | | | |  | | |
|  |  | South Dakota | | |  | | | |  | | |
|  |  | Tennessee | | |  | | | |  | | |
|  |  | Texas | | |  | | | |  | | |
|  |  | Virginia | | |  | | | |  | | |
|  |  | West Virginia | | |  | | | |  | | |
|  |  | Wisconsin | | |  | | | |  | | |
|  |  | Vermont | | |  | | | |  | | |
|  |  | Virginia | | |  | | | |  | | |
|  |  | Washington | | |  | | | |  | | |
|  |  | West Virginia | | |  | | | |  | | |
|  |  | Wisconsin | | |  | | | |  | | |
|  |  | Wyoming | | |  | | | |  | | |
|  |  |  | |  | | | |  | |
|  |  |  |  | | |  |
|  |  |  |  | | |  |

**Table 4. State Newspaper Total Counts**

| **Newspaper** | **Battleground** | **Total Count** |
| --- | --- | --- |
| *Birmingham News* | N | 6 | | |  |
| *Anchorage Daily News* | N | 11 | | |  | |
| *Arizona Republic* | N | 11 | | |  | |
| *Arkansas Democrat Gazette* | N | 24 | | |  | |
| *Los Angeles Times* | N | 20 | | |  | |
| *Denver Post* | Y | 23 | | |  |
| *Hartford Courant* | N | 3 | | |  | |
| *Delaware State News* | N | 9 | | |  | |
| *Tampa Bay Times* | Y | 48 | | |  | |
| *Atlanta Journal & Const* | N | 20 | | |  | |
| *Honolulu Star-Bulletin* | N | 15 | | |  | |
| *Idaho Statesmen* | N | 2 | | |  | |
| *Chicago Sun-Times* | N | 3 | | |  | |
| *Indianapolis Star* | N | 4 | | |  | |
| *Quad-City Times* | Y | 22 | | |  | |
| *Wichita Eagle* | N | 29 | | |  | |
| *Lexington Herald-Leader* | N | 13 | | |  | |
| *Times-Picayune* | N | 4 | | |  | |
| *Bangor Daily News* | N | 15 | | |  | |
| *Baltimore Sun* | N | 16 | | |  | |
| *Boston Herald* | N | 7 | | |  | |
| *Detroit Free Press* | N | 11 | | |  | |
| *Star Tribune* | N | 16 | | |  | |
| *Sun Herald* | N | 4 | | |  | |
| *St. Louis Post-Dispatch* | N | 7 | | |  | |
| *Billings Gazette* | N | 9 | | |  | |
| *Omaha World-Record* | N | 5 | |
| *Las-Vegas Review-Journal* | Y | 25 |
| *Union-Leader* | N | 11 |
| *Star Ledger* | N | 20 |
| *Albuquerque Journal* | N | 4 |
| *Daily News* | N | 7 |
| *Charlotte Observer* | Y | 27 |
| *Bismarck Tribune* | N | 12 |
| *Plain Dealer* | Y | 14 |
| *Daily Oklahoman* | N | 2 |
| *Oregonian* | N | 5 |
| *Philadelphia Inquirer* | N | 41 |
| *Providence Journal* | N | 24 |
| *Post and Courier* | N | 28 |
| *Aberdeen American News* | N | 13 |
| *Knoxville News Sentinel* | N | 7 |
| *Dallas Morning News* | N | 7 |
| *Salt Lake Tribune* | N | 3 |
| *Rutland Herald* | N | 4 |
| *Richmond Times-Dispatch* | Y | 23 |
| *Seattle Post-Intelligencer* | N | 3 |
| *Charleston Gazette* | N | 25 |
| *Milwaukee Journal Sentinel* | Y | 18 |
| *Wyoming Tribune-Eagle* | N | 0 |

| **Table 5. Top Five Keywords Per Topic Between States** | | | | | | | | |
| --- | --- | --- | --- | --- | --- | --- | --- | --- |
| *Battleground* | “VOTER ID” | “VOTER/ELEC” | “OBAM/ROM” | “REGISTER” | | “APPLIED” | |
|  | ID | ELEC | OBAMA | ALLI | | APPLI | |
|  | LAW | BALLOT | PRESID | CONSULT | | NOTE | |
|  | PHOTO | REGISTR | BARACK | FORM | | MEDIA | |
|  | REQUIR | VOTER | ROMNEY | FLORIDA | | SERVICE | |
|  | JUDG | CAST | MITT | PUBLICATION | | DOE | |
|  |  |  |  | |  | |  | |
| *Non-Battleground* | “ROM/OBAM” | “SUPREME COURT” | “PHOTO ID” | | “ELEC/VOTER” | | “STRATEG ALLI” | |
|  | ROMNEY | COURT | DRIVER | | BALLOT | | STRATEG | |
|  | MITT | LAW | LICENS | | NEWSPAP | | ALLI | |
|  | OBAMA | SIMPSON | CARD | | PUBLICATION | | CONSULT | |
|  | PRESID | SUPREM | CERTIF | | TYPE | | PALM | |
|  | TURZAI | RUL | BIRTH | | ELEC | | BEACH | |
|  |  |  |  | |  | |  | |
| *Restrictive Law* | “VOTER ID” | “SUPREME COURT” | “ROM/OBAM” | | “CONSULT” | | “APPLI” | |
|  | LICENS | COURT | ROMNEY | | ALLI | | ITEM | |
|  | DRIVER | LAW | OBAMA | | CONSULT | | NOTIC | |
|  | CARD | SIMPSON | - | | PALM | | NOTE | |
|  | BIRTH | SUPREM | - | | BEACH | | APPLI | |
|  | REQUIR | JUDG | - | | FORM | | MEDIA | |
|  |  |  |  | |  | |  | |
| *No Restrictive Law* | “BALLOT” | “VOTER ID” | “OBAM/ROM” | | “SUPREME COURT” | | “STRATEG ALLI” | |
|  | BALLOT | ID | OBAMA | | COURT | | STRATEG | |
|  | ELEC | PHOTO | ROMNEY | | RUL | | ALLI | |
|  | CAST | REQUIR | PRESID | | SUPREM | | CONSULT | |
|  | ABSENTE | LICENS | MITT | | TEXA | | FORM | |
|  | VOT | DRIVER | BARACK | | LAW | | REGISTR | |

Note: Entries are top five keywords for five estimated topics using factor analysis topic modelling for newspaper coverage of voter fraud. All words shown have a factor loading of at least >.30.

| **Table 6. Regression Analysis of Voter Fraud Coverage** | | | | |
| --- | --- | --- | --- | --- |
| *Variables* | Number of Articles | ID Law | Voter Registration | Voter ID |
| Battleground | .670**  (.264) | .277  (1.14) | 2.29**  (.693) | -.197  (1.05) |
| Restrictive Voting Law | .612**  (.250) | 1.20*  (.637) | .989**  (.500) | 1.08**  (.437) |
| Number of Fraud Cases | -.111  (.083) | .073  (.319) | -.116  (.254) | -.028  (.166) |
| % ALEC | -.005  (.016) | -.021  (.050) | -.067  (.042) | -.018  (.028) |
| Presidential Vote  Diff | .007  (.018) | .021  (.048) | -.009  (.040) | .013  (.026) |
| % Black | .008  (.012) | .035  (.034) | -.020  (.029) | .045**  (.021) |
| % Hispanic | .001  (.019) | -.043  (.054) | -.018  (.054) | -.012  (.043) |
| Newspaper Circulation | .001  (.001) | -.001  (.003) | -.001  (.003) | -.002  (.002) |
|  |  |  |  |  |
| Constant | 2.11  (.311) | 1.54  (.852) | 2.62  (.723) | 2.18  (.558) |
|  |  |  |  |  |
| Alpha | .300 | 4.62 | 2.73 | 1.89 |
| Log-likelihood | -166.85 | -123.46 | -137.90 | -166.95 |
| AIC | 353.82 | 266.93 | 295.79 | 353.91 |
| N | 50 | 49 | 49 | 49 |
| Notes: For the number of articles, the cell entries are negative binomial coefficients with bootstrapped standard errors in parentheses. For the ID Law, Voter Registration, and Voter ID columns, the cell entries are Poisson inverse Gaussian coefficients with bootstrapped standard errors in parentheses. All the bootstrapped standard errors are estimated with 1000 replications. Analyses of phrases had one less observation because one state 0 articles.  ** p < .05, * p < .10 | | | | |

**Figure 1. Co-Occurrence Analysis on Topics Associated with Battleground States**


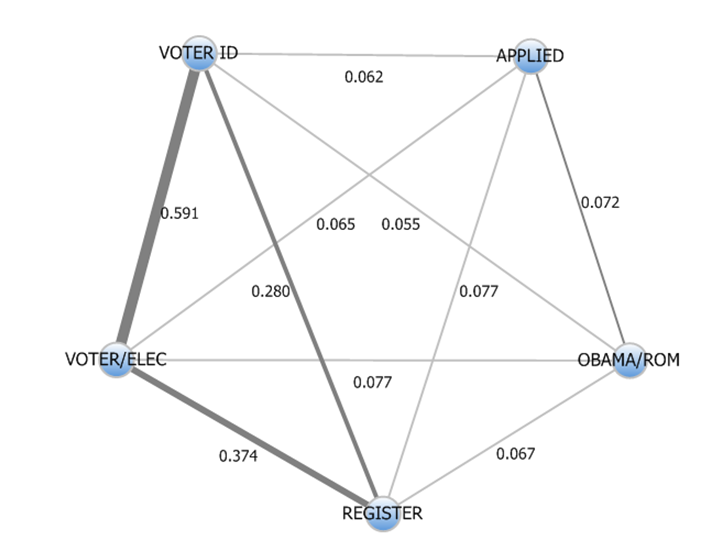


**Figure 2. Co-Occurrence Analysis on Topics Associated with Non- Battleground States**

**
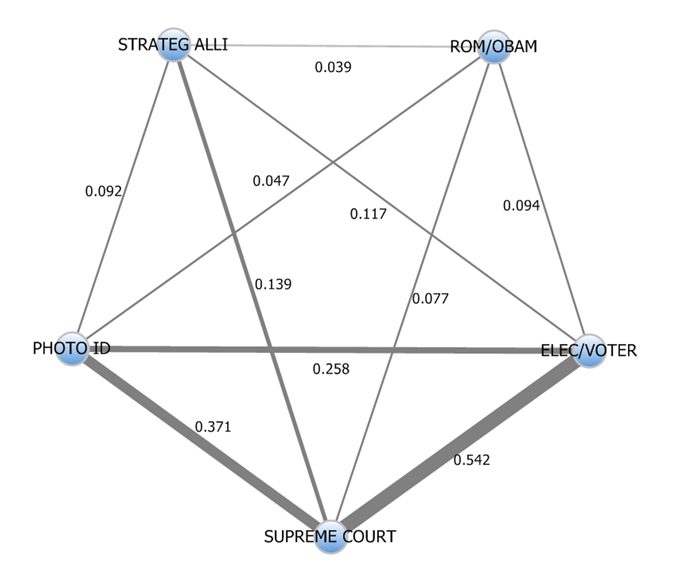
**

**Figure 3. Co-Occurrence Analysis on Topics Associated with States with Restrictive Laws**

**
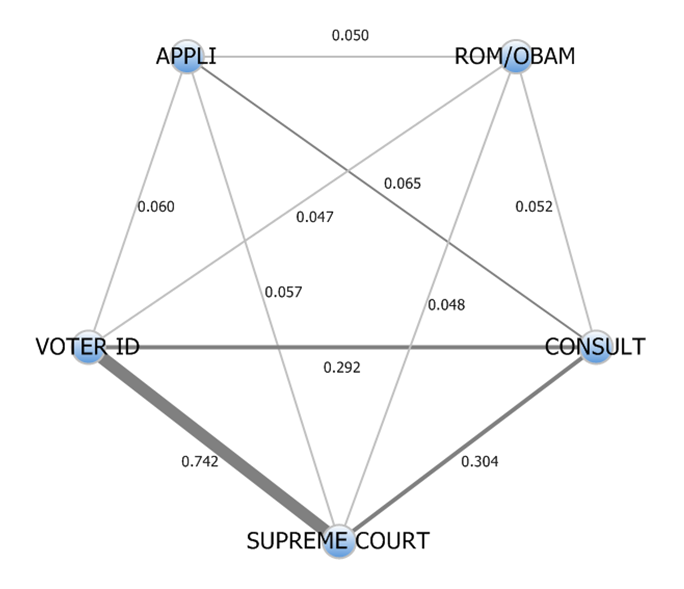
**

**Figure 4. Co-Occurrence Analysis on Topics Associated with States without Restrictive Laws**

**
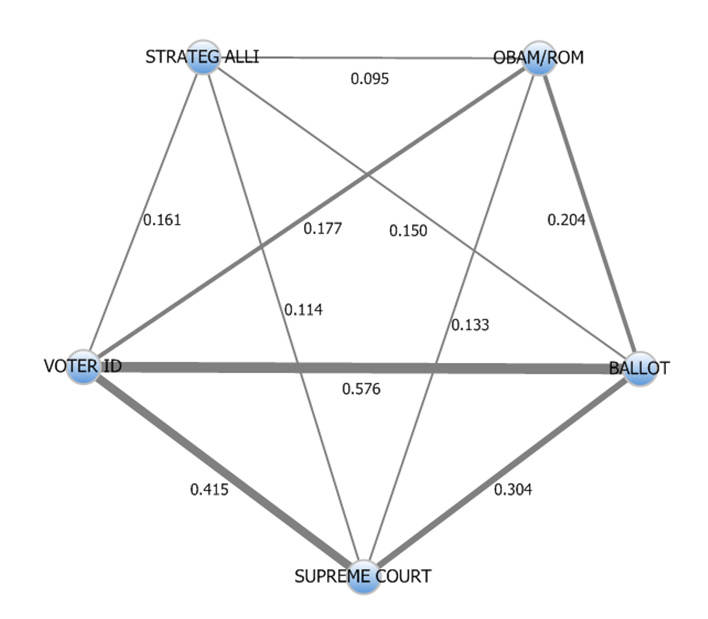
**
